# Supplementary material for: Drosophila Rhodopsin 7 can partially replace the structural role of Rhodopsin 1, but not its physiological function
Source: PubMed Central journal article supplement (PMC5537319; doi:10.1007/s00359-017-1182-8), 2017-05-12
Supplement: 359_2017_1182_MOESM1_ESM.pdf [file 359_2017_1182_MOESM1_ESM.pdf]

***Drosophila* Rhodopsin 7 can partially replace the structural role of Rhodopsin 1, but not its physiological function**

Rudi Grebler<sup>1</sup>, Christa Kistenpfennig<sup>1</sup>, Dirk Rieger<sup>1</sup>, Joachim Bentrop<sup>2</sup>, Stephan Schneuwly<sup>3</sup>,  
Pingkalai R. Senthilan<sup>1</sup>, Charlotte Helfrich-Förster<sup>1\*</sup>

<sup>1</sup> Neurobiology and Genetics, Biocenter, University of Würzburg, 97074 Würzburg,  
Germany

<sup>2</sup> Cell- and Neurobiology, Zoological Institute, Karlsruhe Institute of Technology (KIT),  
Karlsruhe, Germany

<sup>3</sup> Developmental Biology, Institute of Zoology, University of Regensburg,  
Regensburg, Germany

+ present address: Oxitec Ltd, 71 Innovation Drive, Milton Park, Oxford, OX14 4RQ, UK

\*E-mail of corresponding author:

[charlotte.foerster@biozentrum.uni-wuerzburg.de](mailto:charlotte.foerster@biozentrum.uni-wuerzburg.de)

### Supplementary Figure 1

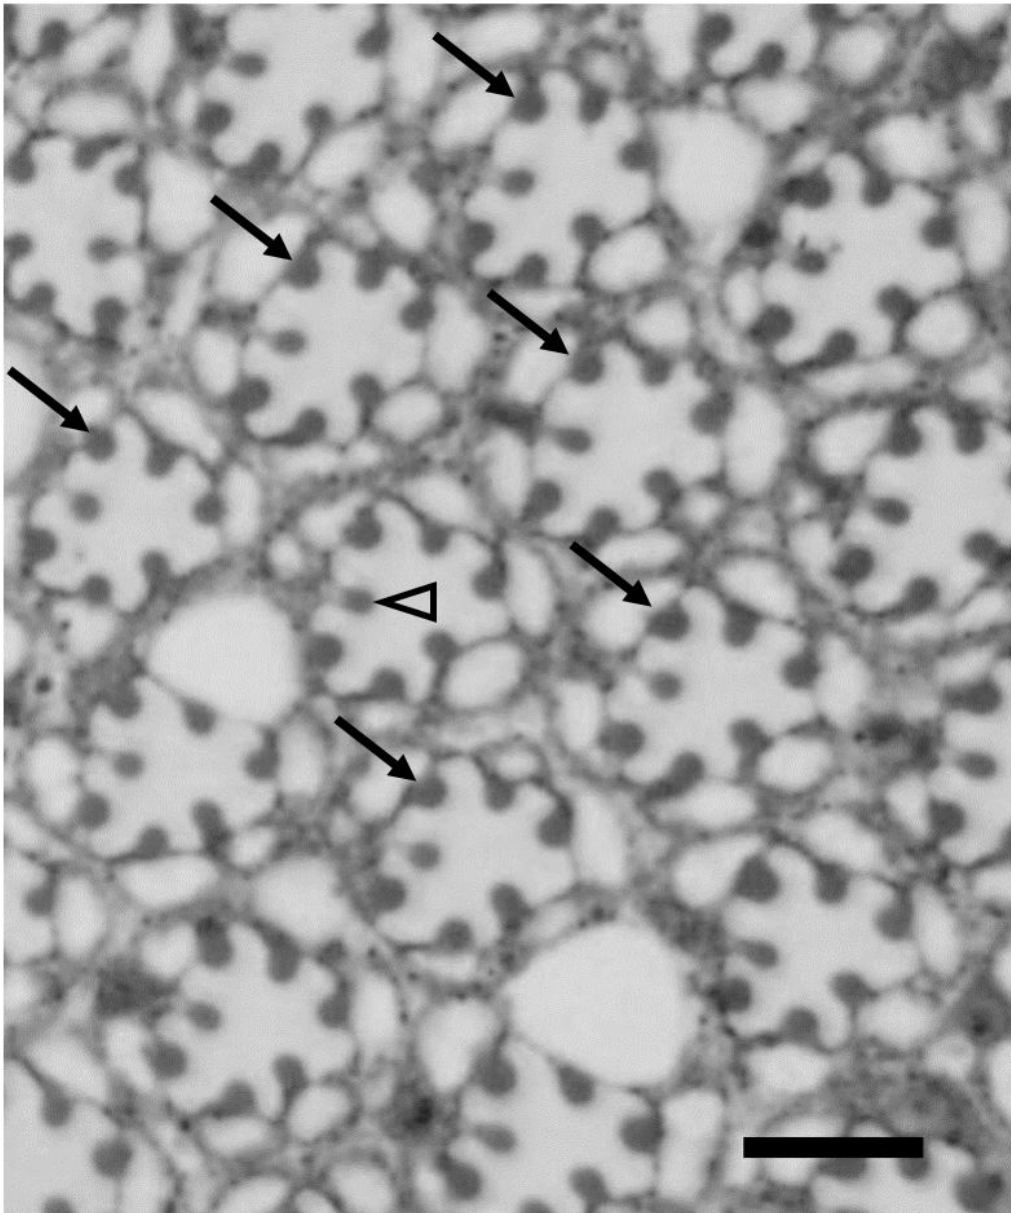

**Figure S1. Flies with Rh7 instead of Rh1 in photoreceptors R1-6 maintain a quite regular structure of the rhabdomeres.**

Semi-thin sections of a retina of a 10d old *Rh1-Rh7;ninaE<sup>17</sup>* fly. Arrowheads point to photoreceptor cells 1 in 6 neighboring ommatida; photoreceptor cell 7 is highlighted in the central ommatidium by an open arrowhead. Scale bar: 5  $\mu$ m.
